# Supplementary material for: XCMAX4: A Robust X Chromosomal Genetic Association Test Accounting for Covariates
Source: MDPI journal article supplement (doi:10.3390/genes13050847), 2022-05-09
Supplement: s1 [file s1]

# Supplementary Material for “XCMAX4: A Robust X Chromosomal Genetic Association Test Accounting for Covariates”

**Table S1** Estimated type I error rate ( $\times 10^{-4}$ ) at the nominal significance level  $1 \times 10^{-4}$  for XCMAX4, FM<sub>01</sub>, FM<sub>02</sub>, FM<sub>F</sub>, and FM<sub>S</sub> against  $q_f$ ,  $q_m$ ,  $\alpha_2$ , and  $\alpha_3$  based on 1,000,000 replicates when  $F = 0.05$ .

| $q_f$ | $q_m$ | $\alpha_3$ | $\alpha_2 = 0.4005$ |                  |                  |                 |                 | $\alpha_2 = -0.4005$ |                  |                  |                 |                 |
|-------|-------|------------|---------------------|------------------|------------------|-----------------|-----------------|----------------------|------------------|------------------|-----------------|-----------------|
|       |       |            | XCMAX4              | FM <sub>01</sub> | FM <sub>02</sub> | FM <sub>F</sub> | FM <sub>S</sub> | XCMAX4               | FM <sub>01</sub> | FM <sub>02</sub> | FM <sub>F</sub> | FM <sub>S</sub> |
| 0.1   | 0.1   | 0.5        | 0.86                | 1.10             | 0.91             | 0.86            | 0.91            | 0.84                 | 1.05             | 0.95             | 0.87            | 1.01            |
|       | 0.2   |            | 0.84                | 0.93             | 0.83             | 0.82            | 0.95            | 0.97                 | 1.02             | 1.08             | 1.02            | 0.93            |
|       | 0.3   |            | 1.12                | 1.03             | 0.93             | 1.13            | 1.02            | 1.01                 | 1.03             | 1.16             | 0.85            | 1.02            |
| 0.2   | 0.1   | 0.5        | 0.90                | 0.94             | 0.95             | 0.80            | 0.91            | 1.01                 | 0.99             | 1.08             | 0.87            | 1.03            |
|       | 0.2   |            | 0.82                | 0.93             | 0.94             | 0.91            | 0.90            | 0.96                 | 1.00             | 1.05             | 1.05            | 1.04            |
|       | 0.3   |            | 0.83                | 0.96             | 0.85             | 0.89            | 0.98            | 0.89                 | 1.08             | 1.05             | 1.04            | 1.05            |
| 0.3   | 0.1   | 0.5        | 0.80                | 0.98             | 0.93             | 1.02            | 0.87            | 0.95                 | 0.97             | 0.88             | 0.97            | 0.85            |
|       | 0.2   |            | 0.84                | 0.93             | 0.94             | 1.13            | 1.01            | 1.16                 | 1.26             | 1.16             | 1.22            | 1.13            |
|       | 0.3   |            | 0.94                | 1.08             | 0.94             | 0.99            | 1.04            | 0.88                 | 0.96             | 0.95             | 1.06            | 0.94            |
| 0.1   | 0.1   | 1.5        | 0.87                | 0.87             | 0.97             | 0.82            | 0.99            | 0.98                 | 0.98             | 0.95             | 0.85            | 1.03            |
|       | 0.2   |            | 0.97                | 1.13             | 1.03             | 0.98            | 1.03            | 0.84                 | 0.88             | 1.04             | 0.81            | 0.91            |
|       | 0.3   |            | 0.86                | 0.78             | 0.92             | 0.87            | 0.75            | 1.03                 | 0.99             | 0.96             | 1.03            | 0.98            |
| 0.2   | 0.1   | 1.5        | 0.91                | 0.88             | 1.01             | 0.80            | 1.00            | 1.00                 | 1.08             | 1.03             | 0.88            | 1.01            |
|       | 0.2   |            | 0.96                | 0.99             | 0.94             | 0.77            | 1.10            | 0.85                 | 0.99             | 1.04             | 0.89            | 0.99            |
|       | 0.3   |            | 1.06                | 0.81             | 1.10             | 1.02            | 0.97            | 0.82                 | 0.94             | 1.00             | 1.06            | 0.88            |
| 0.3   | 0.1   | 1.5        | 0.93                | 1.14             | 0.98             | 1.15            | 0.93            | 1.00                 | 1.15             | 0.92             | 0.98            | 0.92            |
|       | 0.2   |            | 1.07                | 1.21             | 1.07             | 1.14            | 1.13            | 1.03                 | 1.33             | 1.07             | 1.02            | 1.18            |
|       | 0.3   |            | 0.91                | 1.04             | 1.09             | 0.90            | 1.11            | 0.99                 | 1.03             | 0.98             | 1.10            | 1.05            |

**Table S2.** Estimated type I error rate ( $\times 10^{-3}$ ) at the nominal significance level  $1 \times 10^{-3}$  for XCMAX4, FM<sub>01</sub>, FM<sub>02</sub>, FM<sub>F</sub>, and FM<sub>S</sub> against  $q_f$ ,  $q_m$ ,  $\alpha_2$ , and  $\alpha_3$  based on 1,000,000 replicates under HWE.

| $q_f$ | $q_m$ | $\alpha_3$ | $\alpha_2 = 0.4005$ |                  |                  |                 |                 | $\alpha_2 = -0.4005$ |                  |                  |                 |                 |
|-------|-------|------------|---------------------|------------------|------------------|-----------------|-----------------|----------------------|------------------|------------------|-----------------|-----------------|
|       |       |            | XCMAX4              | FM <sub>01</sub> | FM <sub>02</sub> | FM <sub>F</sub> | FM <sub>S</sub> | XCMAX4               | FM <sub>01</sub> | FM <sub>02</sub> | FM <sub>F</sub> | FM <sub>S</sub> |
| 0.1   | 0.1   | 0.5        | 0.89                | 0.96             | 0.96             | 0.97            | 0.94            | 0.90                 | 1.01             | 0.98             | 0.97            | 0.97            |
|       | 0.2   |            | 0.84                | 0.92             | 0.95             | 0.91            | 0.90            | 0.84                 | 0.95             | 0.95             | 0.92            | 0.94            |
|       | 0.3   |            | 0.92                | 0.97             | 1.00             | 0.99            | 0.97            | 0.97                 | 1.12             | 1.09             | 1.03            | 1.10            |
| 0.2   | 0.1   | 0.5        | 0.95                | 1.01             | 1.02             | 0.97            | 1.02            | 0.83                 | 0.92             | 0.88             | 0.90            | 0.90            |
|       | 0.2   |            | 0.87                | 0.96             | 0.98             | 0.93            | 0.95            | 0.81                 | 0.96             | 0.93             | 0.93            | 0.95            |
|       | 0.3   |            | 0.91                | 1.00             | 1.02             | 0.98            | 1.01            | 0.88                 | 0.99             | 1.00             | 0.96            | 0.98            |
| 0.3   | 0.1   | 0.5        | 0.87                | 0.96             | 0.96             | 0.92            | 0.94            | 0.89                 | 1.00             | 0.96             | 0.93            | 0.94            |
|       | 0.2   |            | 0.89                | 1.00             | 1.01             | 0.97            | 1.00            | 0.87                 | 1.00             | 1.02             | 0.94            | 1.01            |
|       | 0.3   |            | 0.85                | 0.94             | 0.95             | 0.96            | 0.95            | 0.96                 | 1.03             | 1.03             | 1.09            | 1.03            |
| 0.1   | 0.1   | 1.5        | 0.90                | 0.99             | 0.95             | 0.92            | 0.97            | 0.85                 | 0.97             | 0.93             | 0.92            | 0.95            |
|       | 0.2   |            | 0.90                | 1.00             | 0.97             | 0.96            | 0.99            | 0.88                 | 0.93             | 0.94             | 0.96            | 0.94            |
|       | 0.3   |            | 0.89                | 0.96             | 1.03             | 1.03            | 0.97            | 0.89                 | 1.00             | 0.99             | 0.97            | 1.00            |
| 0.2   | 0.1   | 1.5        | 0.88                | 0.94             | 0.93             | 0.89            | 0.91            | 0.81                 | 0.96             | 0.94             | 0.95            | 0.95            |
|       | 0.2   |            | 0.86                | 0.96             | 0.97             | 0.95            | 0.96            | 0.86                 | 0.95             | 0.97             | 0.95            | 0.99            |
|       | 0.3   |            | 0.88                | 1.05             | 1.02             | 0.98            | 1.03            | 0.92                 | 0.99             | 1.04             | 1.01            | 1.02            |
| 0.3   | 0.1   | 1.5        | 0.91                | 1.00             | 1.01             | 0.97            | 1.00            | 0.89                 | 1.04             | 1.01             | 0.91            | 0.99            |
|       | 0.2   |            | 0.83                | 0.95             | 0.94             | 0.93            | 0.94            | 0.82                 | 0.93             | 0.92             | 0.94            | 0.92            |
|       | 0.3   |            | 0.88                | 1.01             | 0.98             | 1.01            | 0.99            | 0.88                 | 1.03             | 1.03             | 1.00            | 1.03            |

**Table S3.** Estimated type I error rate ( $\times 10^{-5}$ ) at the nominal significance level  $1 \times 10^{-5}$  for XCMAX4, FM<sub>01</sub>, FM<sub>02</sub>, FM<sub>F</sub>, and FM<sub>S</sub> against  $q_f$ ,  $q_m$ ,  $\alpha_2$ , and  $\alpha_3$  based on 1,000,000 replicates under HWE.

| $q_f$ | $q_m$ | $\alpha_3$ | $\alpha_2 = 0.4005$ |                  |                  |                 |                 | $\alpha_2 = -0.4005$ |                  |                  |                 |                 |
|-------|-------|------------|---------------------|------------------|------------------|-----------------|-----------------|----------------------|------------------|------------------|-----------------|-----------------|
|       |       |            | XCMAX4              | FM <sub>01</sub> | FM <sub>02</sub> | FM <sub>F</sub> | FM <sub>S</sub> | XCMAX4               | FM <sub>01</sub> | FM <sub>02</sub> | FM <sub>F</sub> | FM <sub>S</sub> |
| 0.    | 0.1   | 0.5        | 0.8                 | 0.9              | 1.0              | 0.9             | 1.0             | 0.6                  | 0.8              | 0.5              | 0.4             | 0.6             |
| 1     | 0.2   |            | 0.5                 | 0.5              | 1.0              | 0.5             | 0.6             | 0.6                  | 0.5              | 0.5              | 0.6             | 0.5             |
|       | 0.3   |            | 0.9                 | 0.7              | 1.0              | 0.4             | 0.8             | 0.5                  | 0.3              | 0.8              | 0.4             | 0.2             |
| 0.    | 0.1   |            | 0.8                 | 0.8              | 0.6              | 0.6             | 0.6             | 0.6                  | 0.8              | 0.8              | 0.5             | 0.8             |
| 2     | 0.2   |            | 1.2                 | 1.1              | 0.8              | 0.8             | 1.1             | 0.7                  | 0.7              | 0.8              | 1.4             | 0.7             |
|       | 0.3   |            | 0.8                 | 0.6              | 1.2              | 0.6             | 0.8             | 0.5                  | 0.4              | 0.8              | 0.8             | 0.9             |
| 0.    | 0.1   |            | 0.8                 | 0.6              | 0.9              | 0.9             | 0.8             | 1.1                  | 1.2              | 1.1              | 1.1             | 1.1             |
| 3     | 0.2   |            | 1.2                 | 1.5              | 1.2              | 1.5             | 1.3             | 0.9                  | 1.2              | 1.1              | 1.2             | 1.1             |
|       | 0.3   |            | 1.1                 | 1.0              | 1.0              | 1.0             | 0.9             | 1.0                  | 1.2              | 1.1              | 1.1             | 0.8             |
| 0.    | 0.1   | 1.5        | 0.4                 | 0.4              | 0.8              | 1.1             | 0.6             | 1.1                  | 0.8              | 0.8              | 0.7             | 1.0             |
| 1     | 0.2   |            | 0.3                 | 0.3              | 0.6              | 0.3             | 0.3             | 0.9                  | 0.3              | 0.7              | 0.9             | 0.6             |
|       | 0.3   |            | 0.6                 | 1.0              | 0.5              | 0.9             | 1.1             | 1.4                  | 1.6              | 1.4              | 1.4             | 1.4             |
| 0.    | 0.1   |            | 0.7                 | 0.9              | 1.0              | 0.8             | 0.9             | 1.1                  | 1.2              | 1.2              | 0.8             | 1.1             |
| 2     | 0.2   |            | 1.3                 | 1.1              | 0.7              | 1.7             | 1.0             | 0.9                  | 1.0              | 1.3              | 0.9             | 1.1             |
|       | 0.3   |            | 1.0                 | 1.2              | 1.0              | 1.3             | 1.4             | 1.2                  | 0.9              | 1.1              | 1.4             | 0.8             |
| 0.    | 0.1   |            | 0.7                 | 1.5              | 0.9              | 0.4             | 0.8             | 0.8                  | 1.2              | 0.8              | 0.6             | 0.6             |
| 3     | 0.2   |            | 0.8                 | 1.1              | 0.7              | 1.1             | 1.0             | 0.5                  | 0.9              | 1.0              | 0.8             | 0.9             |
|       | 0.3   |            | 0.4                 | 0.5              | 0.3              | 0.4             | 0.3             | 0.8                  | 0.7              | 0.9              | 1.2             | 0.6             |

**Table S4.** Estimated type I error rate ( $\times 10^{-3}$ ) at the nominal significance level  $1 \times 10^{-3}$  for XCMAX4, FM<sub>01</sub>, FM<sub>02</sub>, FM<sub>F</sub>, and FM<sub>S</sub> against  $q_f$ ,  $q_m$ ,  $\alpha_2$ , and  $\alpha_3$  based on 1,000,000 replicates when  $F = 0.05$ .

| $q_f$ | $q_m$ | $\alpha_3$ | $\alpha_2 = 0.4005$ |                  |                  |                 |                 | $\alpha_2 = -0.4005$ |                  |                  |                 |                 |
|-------|-------|------------|---------------------|------------------|------------------|-----------------|-----------------|----------------------|------------------|------------------|-----------------|-----------------|
|       |       |            | XCMAX4              | FM <sub>01</sub> | FM <sub>02</sub> | FM <sub>F</sub> | FM <sub>S</sub> | XCMAX4               | FM <sub>01</sub> | FM <sub>02</sub> | FM <sub>F</sub> | FM <sub>S</sub> |
| 0.1   | 0.1   | 0.5        | 0.83                | 0.93             | 0.95             | 0.89            | 0.93            | 0.82                 | 0.93             | 0.90             | 0.89            | 0.93            |
|       | 0.2   |            | 0.90                | 0.98             | 1.02             | 0.92            | 0.98            | 0.88                 | 0.99             | 0.96             | 1.02            | 0.99            |
|       | 0.3   |            | 0.91                | 1.02             | 1.04             | 0.99            | 1.01            | 0.87                 | 0.97             | 0.96             | 1.01            | 0.97            |
| 0.2   | 0.1   |            | 0.90                | 0.97             | 0.98             | 0.96            | 0.97            | 0.96                 | 1.02             | 1.09             | 0.99            | 1.07            |
|       | 0.2   |            | 0.85                | 0.99             | 0.94             | 0.93            | 0.97            | 0.85                 | 0.98             | 0.95             | 0.99            | 0.94            |
|       | 0.3   |            | 0.90                | 0.97             | 0.98             | 1.02            | 0.97            | 0.90                 | 1.00             | 0.99             | 0.96            | 1.01            |
| 0.3   | 0.1   |            | 0.90                | 0.98             | 0.96             | 0.97            | 0.95            | 0.88                 | 1.01             | 1.00             | 0.93            | 0.98            |
|       | 0.2   |            | 0.83                | 0.95             | 0.94             | 0.99            | 0.97            | 0.81                 | 0.88             | 0.89             | 0.95            | 0.89            |
|       | 0.3   |            | 0.91                | 1.05             | 1.06             | 1.02            | 1.04            | 0.80                 | 0.95             | 0.90             | 0.94            | 0.93            |
| 0.1   | 0.1   | 1.5        | 0.89                | 0.95             | 1.00             | 0.95            | 1.00            | 0.84                 | 0.91             | 0.93             | 0.89            | 0.93            |
|       | 0.2   |            | 0.93                | 1.03             | 1.00             | 0.98            | 1.04            | 0.90                 | 1.00             | 0.97             | 0.97            | 0.99            |
|       | 0.3   |            | 0.84                | 0.94             | 0.93             | 0.94            | 0.93            | 0.88                 | 1.00             | 1.01             | 1.04            | 1.00            |
| 0.2   | 0.1   |            | 0.91                | 0.99             | 1.04             | 0.91            | 1.02            | 0.89                 | 1.02             | 1.00             | 0.92            | 0.99            |
|       | 0.2   |            | 0.83                | 1.00             | 0.94             | 0.92            | 0.94            | 0.86                 | 0.94             | 0.99             | 0.95            | 0.97            |
|       | 0.3   |            | 0.90                | 1.01             | 0.97             | 1.00            | 1.01            | 0.87                 | 0.97             | 0.99             | 0.96            | 0.95            |
| 0.3   | 0.1   |            | 0.87                | 0.94             | 0.94             | 0.92            | 0.93            | 0.90                 | 0.98             | 1.04             | 0.98            | 1.03            |
|       | 0.2   |            | 0.91                | 1.05             | 1.01             | 1.04            | 1.00            | 0.90                 | 1.01             | 1.00             | 0.97            | 0.98            |
|       | 0.3   |            | 0.87                | 1.02             | 0.98             | 0.98            | 1.01            | 0.87                 | 1.02             | 0.98             | 1.00            | 0.97            |

**Table S5.** Estimated type I error rate ( $\times 10^{-5}$ ) at the nominal significance level  $1 \times 10^{-5}$  for XCMAX4, FM<sub>01</sub>, FM<sub>02</sub>, FM<sub>F</sub>, and FM<sub>S</sub> against  $q_f$ ,  $q_m$ ,  $\alpha_2$ , and  $\alpha_3$  based on 1,000,000 replicates when  $F = 0.05$ .

| $q_f$ | $q_m$ | $\alpha_3$ | $\alpha_2 = 0.4005$ |                  |                  |                 |                 | $\alpha_2 = -0.4005$ |                  |                  |                 |                 |
|-------|-------|------------|---------------------|------------------|------------------|-----------------|-----------------|----------------------|------------------|------------------|-----------------|-----------------|
|       |       |            | XCMAX4              | FM <sub>01</sub> | FM <sub>02</sub> | FM <sub>F</sub> | FM <sub>S</sub> | XCMAX4               | FM <sub>01</sub> | FM <sub>02</sub> | FM <sub>F</sub> | FM <sub>S</sub> |
| 0.1   | 0.1   | 0.5        | 1.0                 | 0.8              | 1.4              | 0.8             | 1.1             | 1.2                  | 0.4              | 0.8              | 0.5             | 0.5             |
|       | 0.2   |            | 0.8                 | 0.7              | 0.8              | 1.2             | 0.7             | 0.8                  | 0.7              | 1.0              | 1.0             | 0.9             |
|       | 0.3   |            | 0.6                 | 1.1              | 0.9              | 1.0             | 1.1             | 1.4                  | 1.1              | 1.2              | 0.6             | 1.1             |
| 0.2   | 0.1   |            | 1.1                 | 1.5              | 0.9              | 1.0             | 0.9             | 0.9                  | 0.8              | 1.1              | 0.4             | 0.9             |
|       | 0.2   |            | 2.0                 | 1.1              | 0.6              | 0.9             | 1.1             | 1.0                  | 1.0              | 1.3              | 1.5             | 1.0             |
|       | 0.3   |            | 0.4                 | 0.5              | 0.7              | 0.8             | 0.6             | 0.7                  | 0.5              | 0.9              | 0.4             | 1.0             |
| 0.3   | 0.1   |            | 0.8                 | 1.1              | 0.7              | 0.3             | 0.7             | 0.8                  | 0.8              | 1.2              | 0.6             | 1.3             |
|       | 0.2   |            | 0.8                 | 0.8              | 0.7              | 1.2             | 0.8             | 1.7                  | 2.2              | 2.2              | 2.1             | 1.8             |
|       | 0.3   |            | 1.3                 | 1.1              | 1.1              | 1.8             | 1.4             | 0.8                  | 1.5              | 1.2              | 1.2             | 1.1             |
| 0.1   | 0.1   | 1.5        | 1.0                 | 0.9              | 0.7              | 1.4             | 0.7             | 1.0                  | 1.0              | 0.7              | 0.7             | 0.9             |
|       | 0.2   |            | 1.4                 | 1.3              | 1.0              | 1.1             | 1.1             | 1.0                  | 1.1              | 1.0              | 0.3             | 1.0             |
|       | 0.3   |            | 0.6                 | 0.6              | 0.5              | 0.7             | 0.6             | 0.9                  | 1.3              | 0.8              | 1.2             | 1.3             |
| 0.2   | 0.1   |            | 1.0                 | 0.6              | 0.7              | 1.1             | 0.7             | 1.3                  | 0.7              | 1.1              | 1.1             | 1.1             |
|       | 0.2   |            | 0.7                 | 1.2              | 1.1              | 0.7             | 1.0             | 1.2                  | 1.4              | 1.2              | 0.9             | 1.4             |
|       | 0.3   |            | 1.5                 | 1.0              | 1.1              | 1.1             | 0.8             | 0.8                  | 0.8              | 1.0              | 1.1             | 1.2             |
| 0.3   | 0.1   |            | 1.2                 | 1.1              | 1.1              | 0.9             | 0.8             | 0.8                  | 1.5              | 1.0              | 0.9             | 1.2             |
|       | 0.2   |            | 1.3                 | 1.4              | 1.2              | 1.5             | 1.2             | 2.0                  | 1.9              | 1.7              | 1.2             | 1.9             |
|       | 0.3   |            | 0.8                 | 0.9              | 1.0              | 1.1             | 0.9             | 1.5                  | 1.3              | 0.9              | 1.7             | 1.2             |

**Table S6** Time used to test 2000 SNPs with a sample size of 5000\*

| Time (second) | XCMAX4 | FM <sub>01</sub> | FM <sub>02</sub> | FM <sub>F</sub> | FM <sub>S</sub> |
|---------------|--------|------------------|------------------|-----------------|-----------------|
| User          | 9.79   | 19.39            | 19.28            | 19.36           | 19.35           |
| System        | 0.00   | 0.00             | 0.00             | 0.02            | 0.02            |
| Elapsed       | 9.79   | 19.29            | 19.29            | 19.38           | 19.36           |

\* The fitted model is the same as that in our simulation study. The results are obtained in R 4.1.2, running on a laptop with CPU: AMD Ryzen 5 5600H and RAM: 16G.

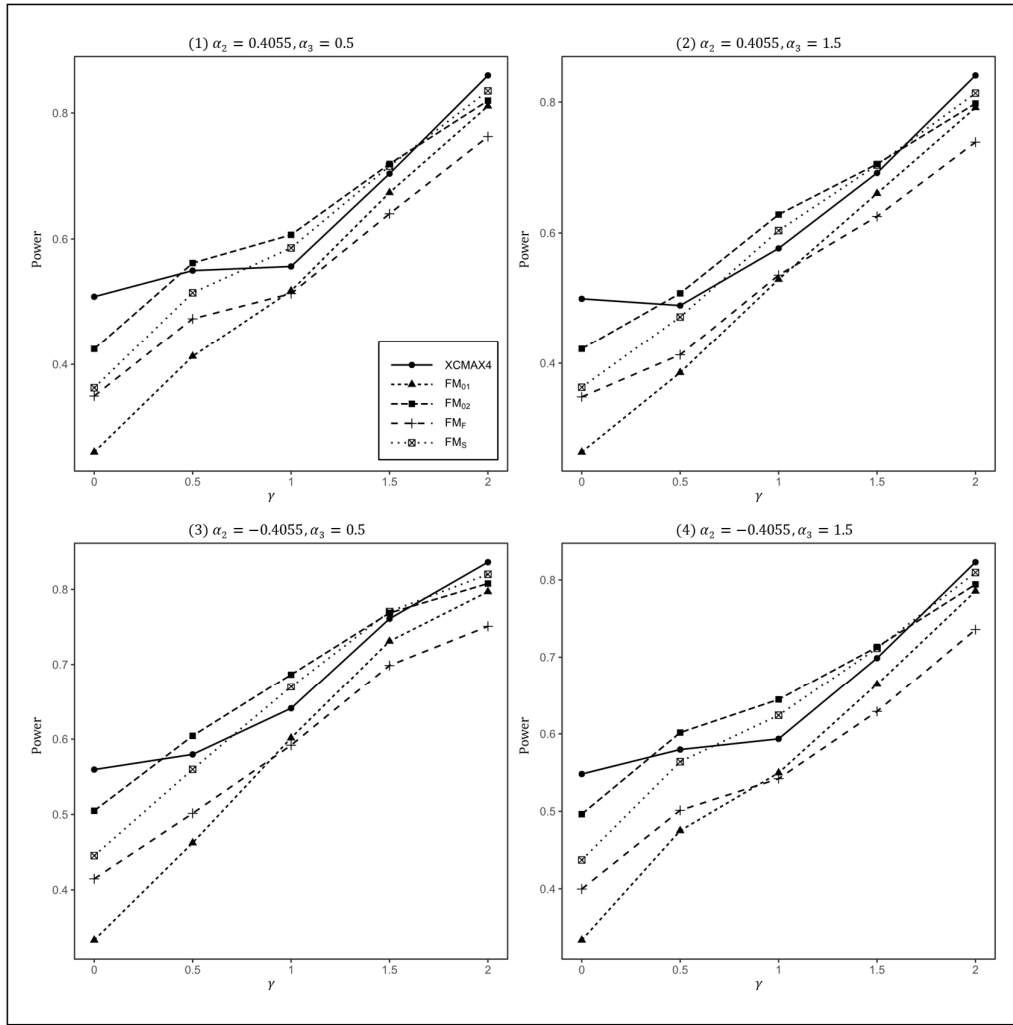

**Figure S1.** Estimated powers of XCMA4, FM<sub>01</sub>, FM<sub>02</sub>, FM<sub>F</sub>, and FM<sub>S</sub> under various XCI models. The simulation is based on 10,000 replicates with  $\beta = 0.15$ ,  $\alpha_1 = -5$ ,  $F = 0.05$ , and  $q_f = q_m = 0.3$ .

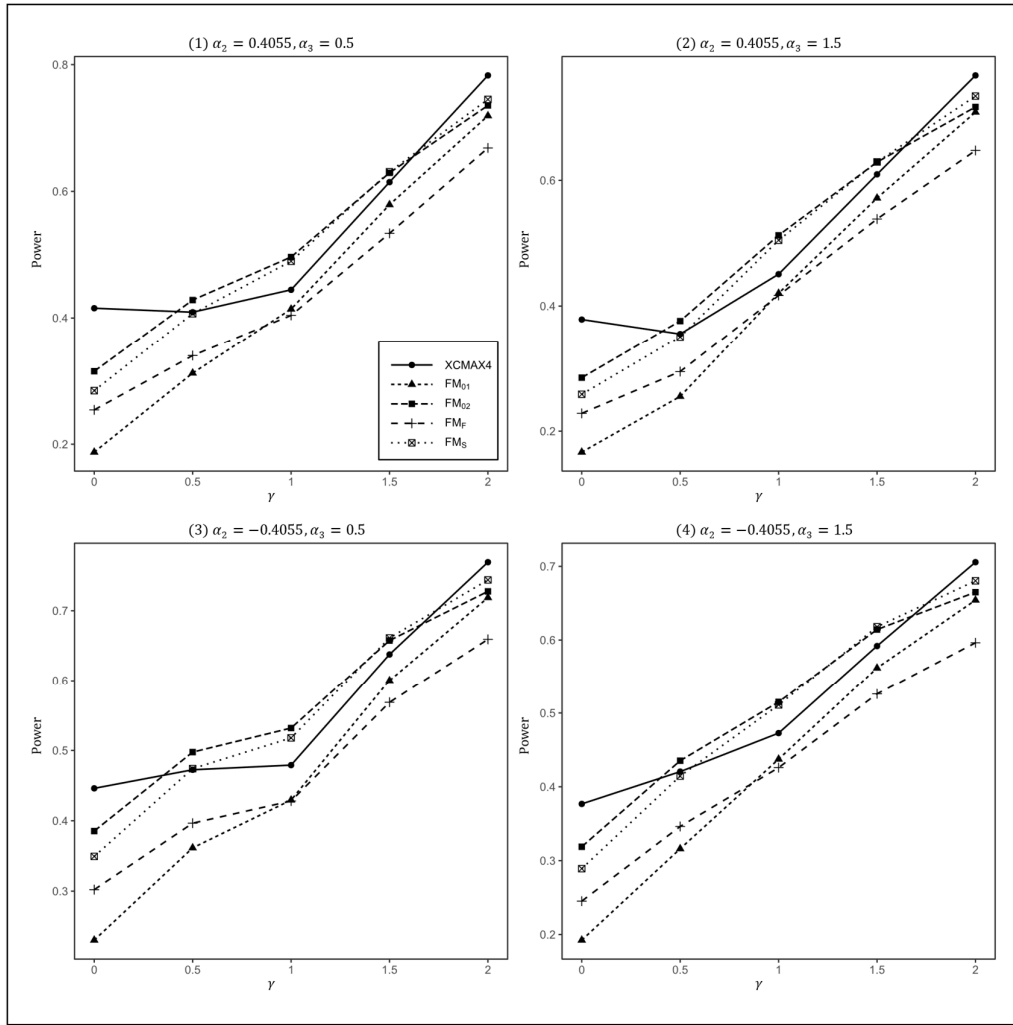

**Figure S2.** Estimated powers of XCMAX4, FM<sub>01</sub>, FM<sub>02</sub>, FM<sub>F</sub>, and FM<sub>S</sub> under various XCI models. The simulation is based on 10,000 replicates with  $\beta = 0.15$ ,  $\alpha_1 = -5$ ,  $F = 0.05$ ,  $q_f = 0.3$ , and  $q_m = 0.2$ .

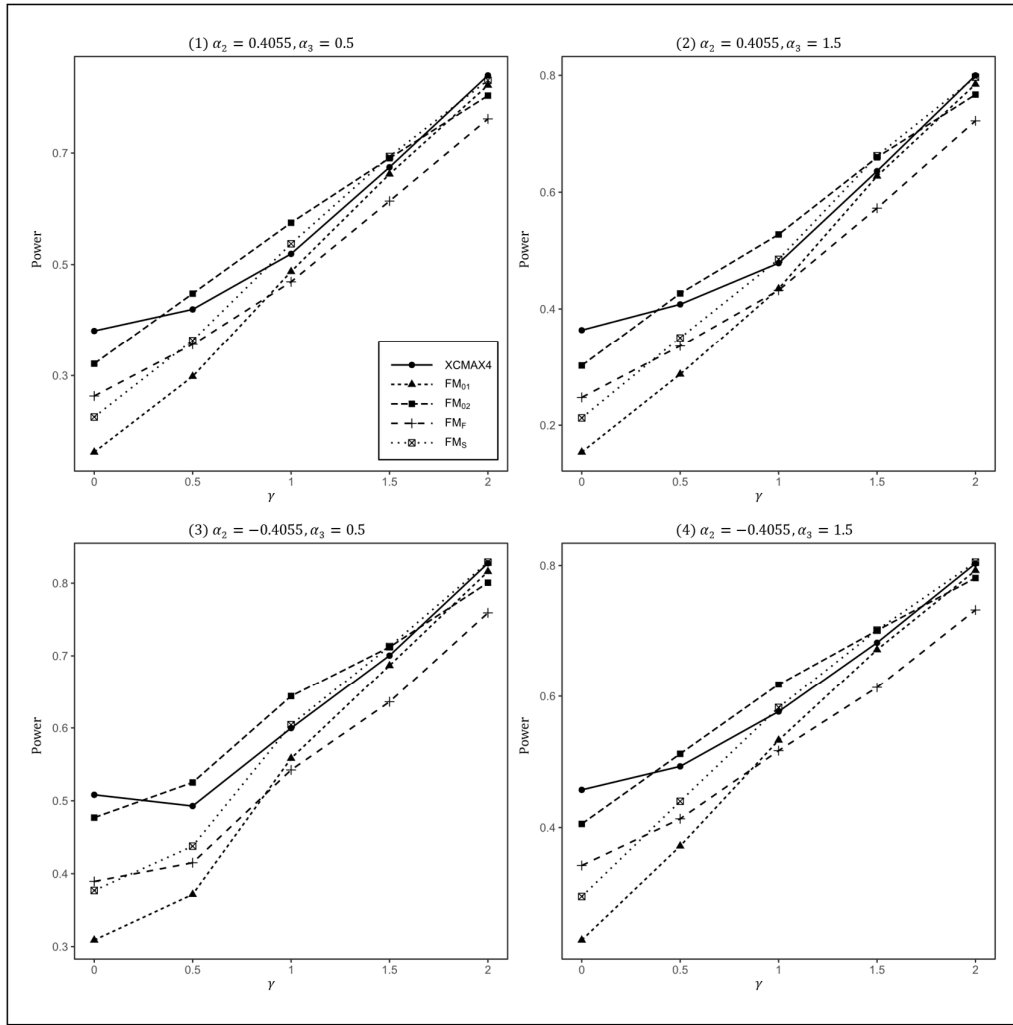

**Figure S3.** Estimated powers of XCMAX4, FM<sub>01</sub>, FM<sub>02</sub>, FM<sub>F</sub>, and FM<sub>S</sub> under various XCI models. The simulation is based on 10,000 replicates with  $\beta = 0.15$ ,  $\alpha_1 = -5$ ,  $F = 0.05$ ,  $q_f = 0.2$ , and  $q_m = 0.3$ .

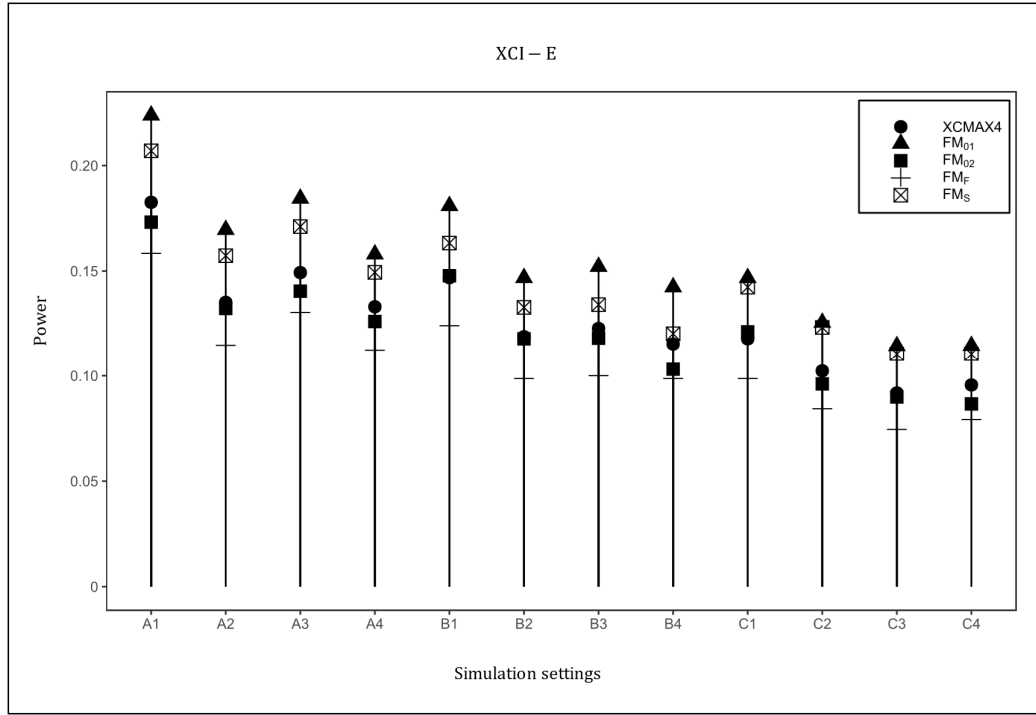

**Figure S4.** Powers of XCMA4, FM<sub>01</sub>, FM<sub>02</sub>, FM<sub>F</sub>, and FM<sub>S</sub> under the XCI-E pattern. The simulation is based on 10,000 replicates with  $\beta = 0.15$ ,  $\alpha_1 = -5$ , and  $F = 0.05$ . In the horizontal coordinates, "A", "B" and "C" represent three combinations of  $(q_f, q_m)$ : (0.3,0.3), (0.3,0.2), and (0.2,0.3), respectively. The numbers 1-4 represent four combinations of  $(\alpha_2, \alpha_3)$ : (0.4055,0.5), (0.4055,1.5), (-0.4055,0.5), and (-0.4055,1.5), respectively.

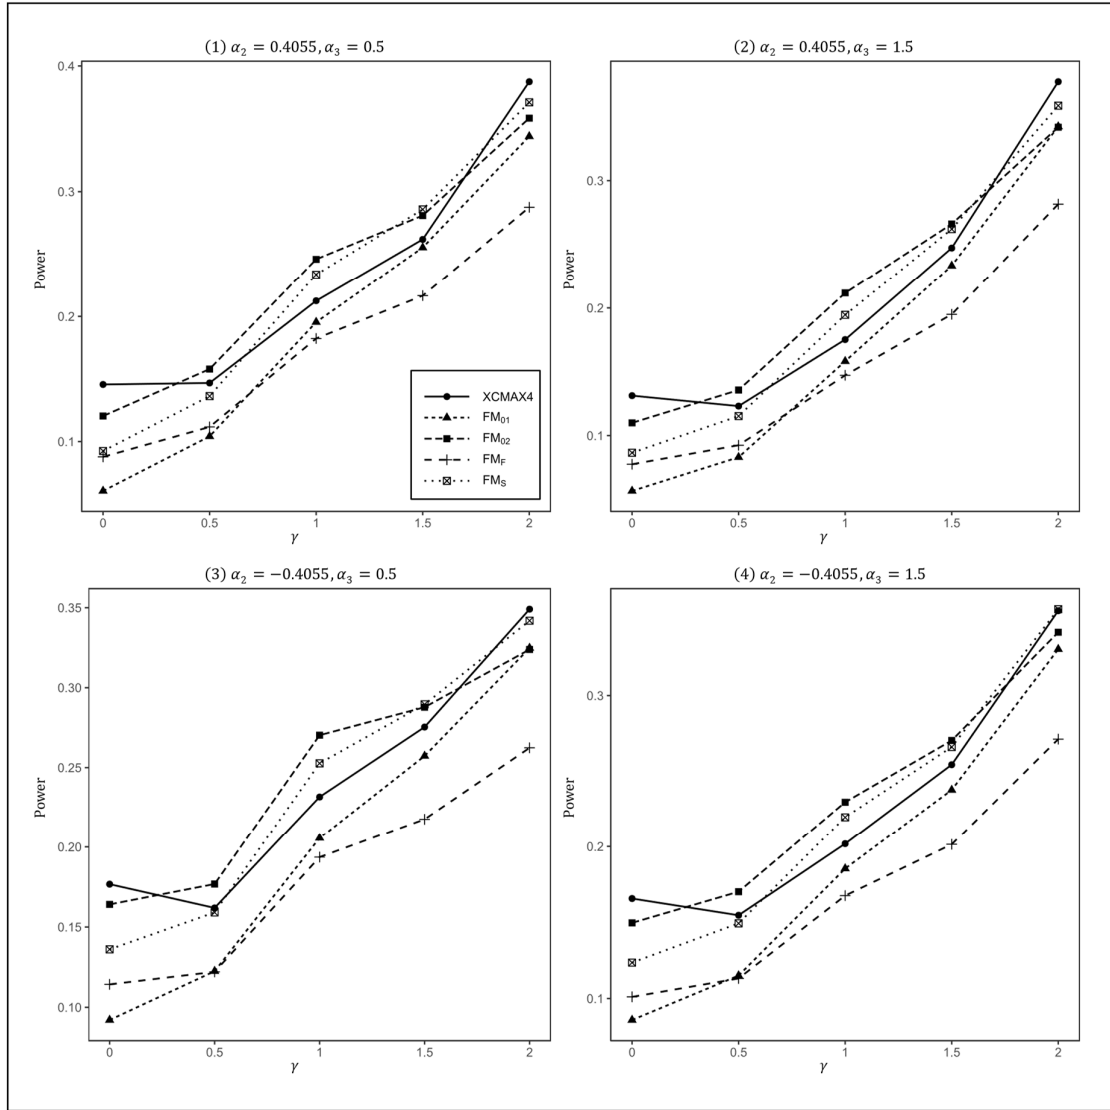

**Figure S5.** Estimated powers of XCMAX4, FM<sub>01</sub>, FM<sub>02</sub>, FM<sub>F</sub>, and FM<sub>S</sub> under various XCI models. The simulation is based on 10,000 replicates with  $\beta = 0.1116$ ,  $\alpha_1 = -5$ ,  $F = 0$ , and  $q_f = q_m = 0.3$ .



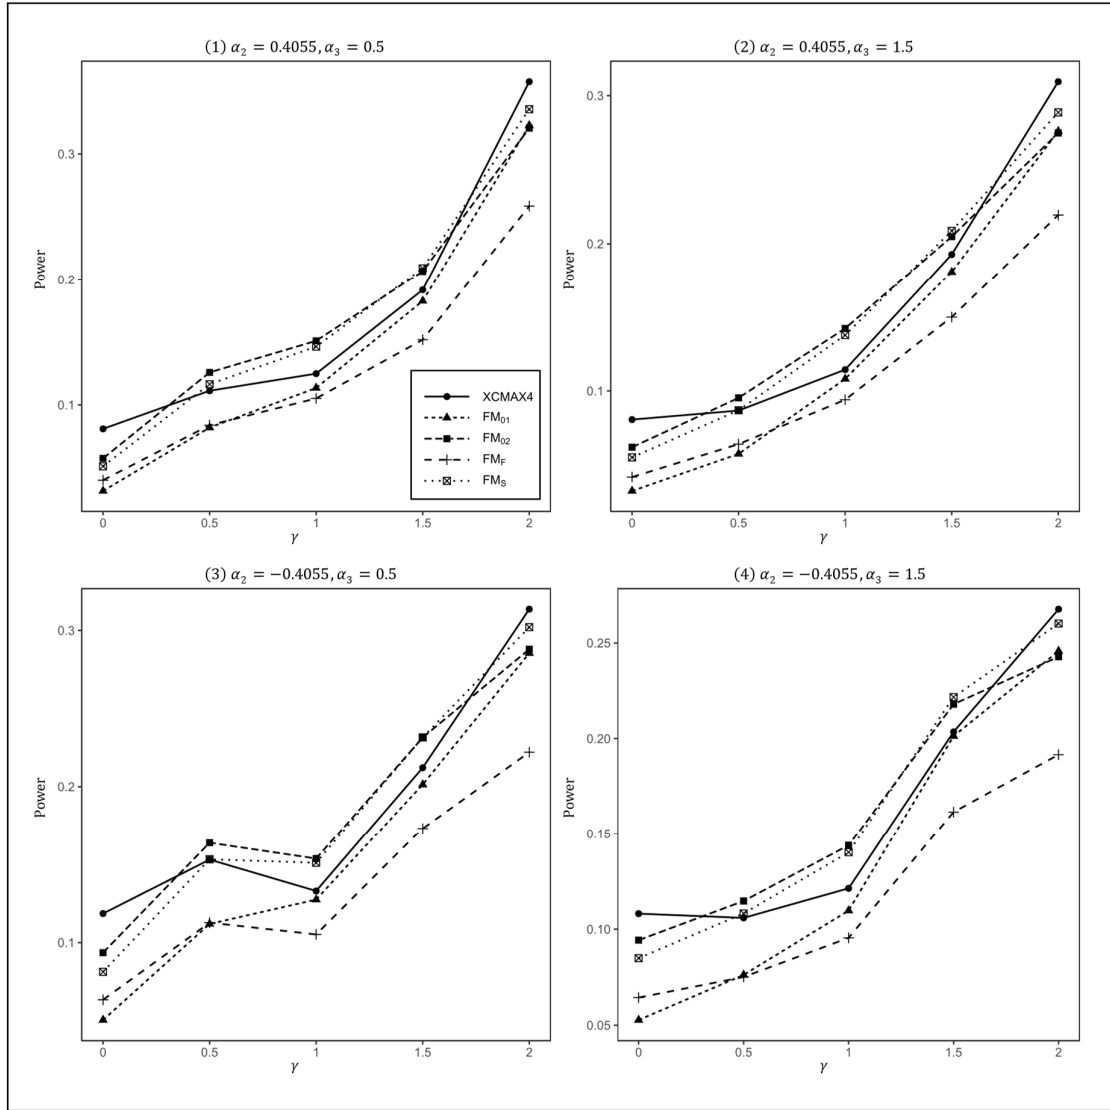

**Figure S6.** Estimated powers of XCMA4, FM<sub>01</sub>, FM<sub>02</sub>, FM<sub>F</sub>, and FM<sub>S</sub> under various XCI models. The simulation is based on 10,000 replicates with  $\beta = 0.1116$ ,  $\alpha_1 = -5$ ,  $F = 0$ ,  $q_f = 0.3$ , and  $q_m = 0.2$ .

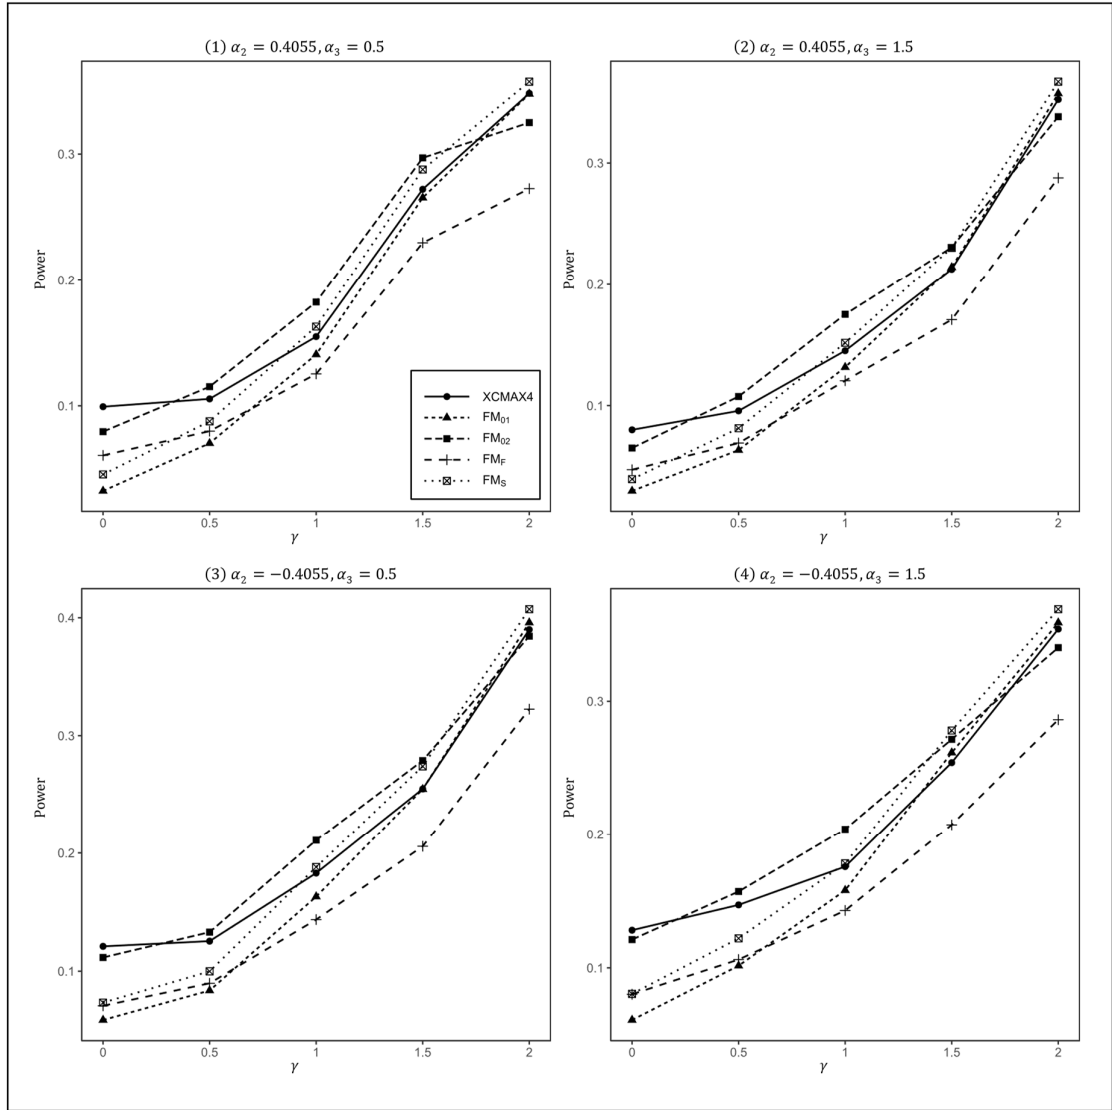

**Figure S7.** Estimated powers of XCMAX4, FM<sub>01</sub>, FM<sub>02</sub>, FM<sub>F</sub>, and FM<sub>S</sub> under various XCI models. The simulation is based on 10,000 replicates with  $\beta = 0.1116$ ,  $\alpha_1 = -5$ ,  $F = 0$ ,  $q_f = 0.2$ , and  $q_m = 0.3$ .

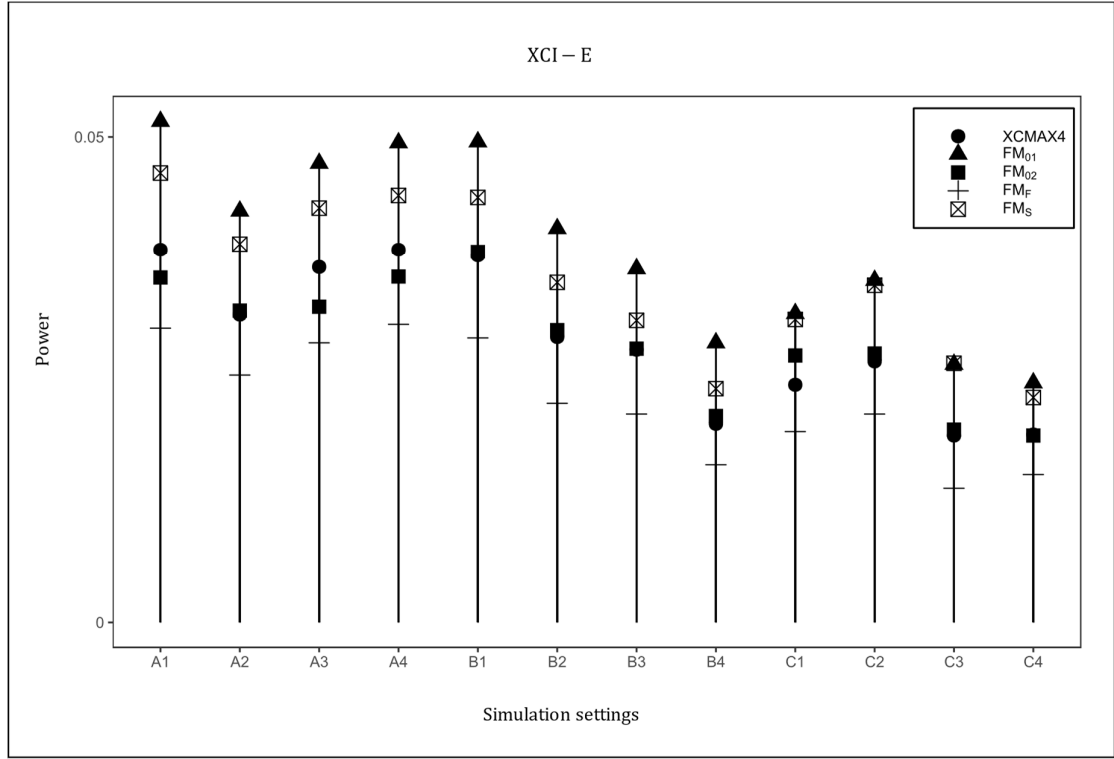

**Figure S8.** Powers of XCMAx4, FM<sub>01</sub>, FM<sub>02</sub>, FM<sub>F</sub>, and FM<sub>S</sub> under XCI-E. The simulation is based on 10,000 replicates with  $\beta = 0.1116$ ,  $\alpha_1 = -5$ , and  $F = 0$ . In the horizontal coordinates, "A", "B" and "C" represent three combinations of  $(q_f, q_m)$ : (0.3,0.3), (0.3,0.2), and (0.2,0.3), respectively, and the numbers 1-4 represent four combinations of  $(\alpha_2, \alpha_3)$ : (0.4055,0.5), (0.4055,1.5), (-0.4055,0.5), and (-0.4055,1.5), respectively.

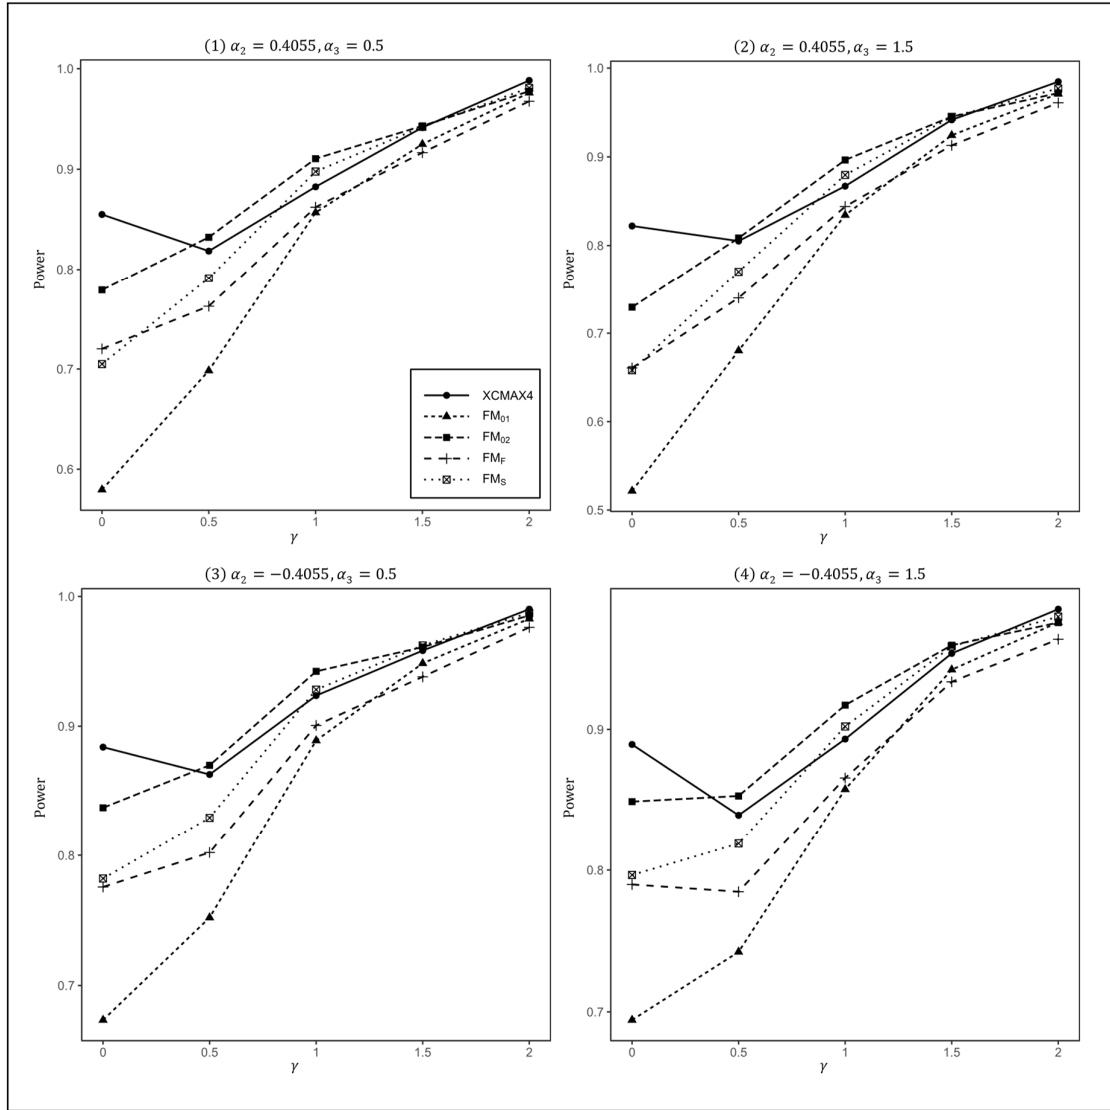

**Figure S9.** Estimated powers of XCMA4, FM<sub>01</sub>, FM<sub>02</sub>, FM<sub>F</sub>, and FM<sub>S</sub> under various XCI models. The simulation is based on 10,000 replicates with  $\beta = 0.1858$ ,  $\alpha_1 = -5$ ,  $F = 0$ , and  $q_f = q_m = 0.3$ .

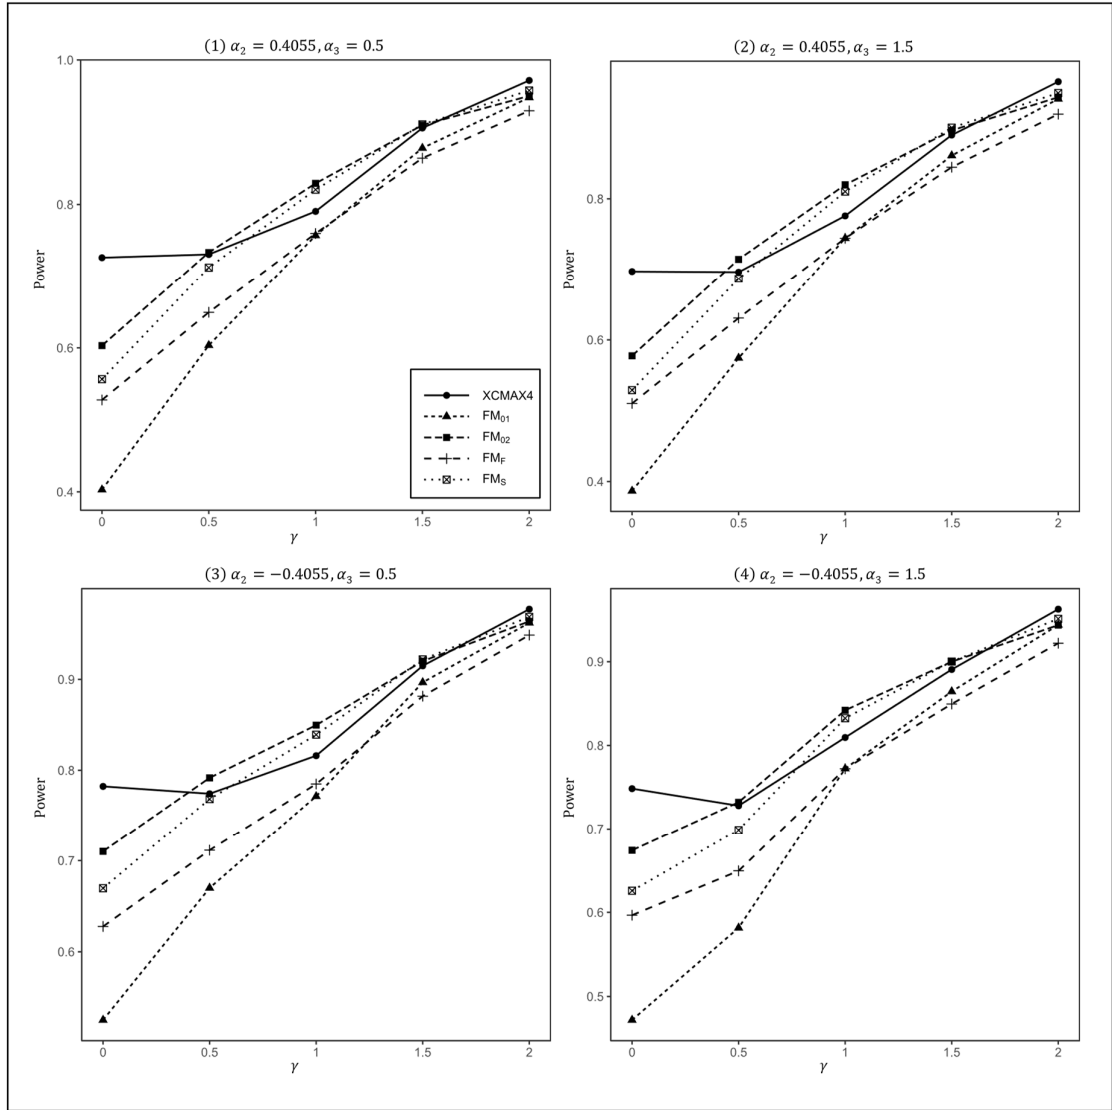

**Figure S10.** Estimated powers of XCMAX4, FM<sub>01</sub>, FM<sub>02</sub>, FM<sub>F</sub>, and FM<sub>S</sub> under various XCI models. The simulation is based on 10,000 replicates with  $\beta = 0.1858$ ,  $\alpha_1 = -5$ ,  $F = 0$ ,  $q_f = 0.3$ , and  $q_m = 0.2$ .

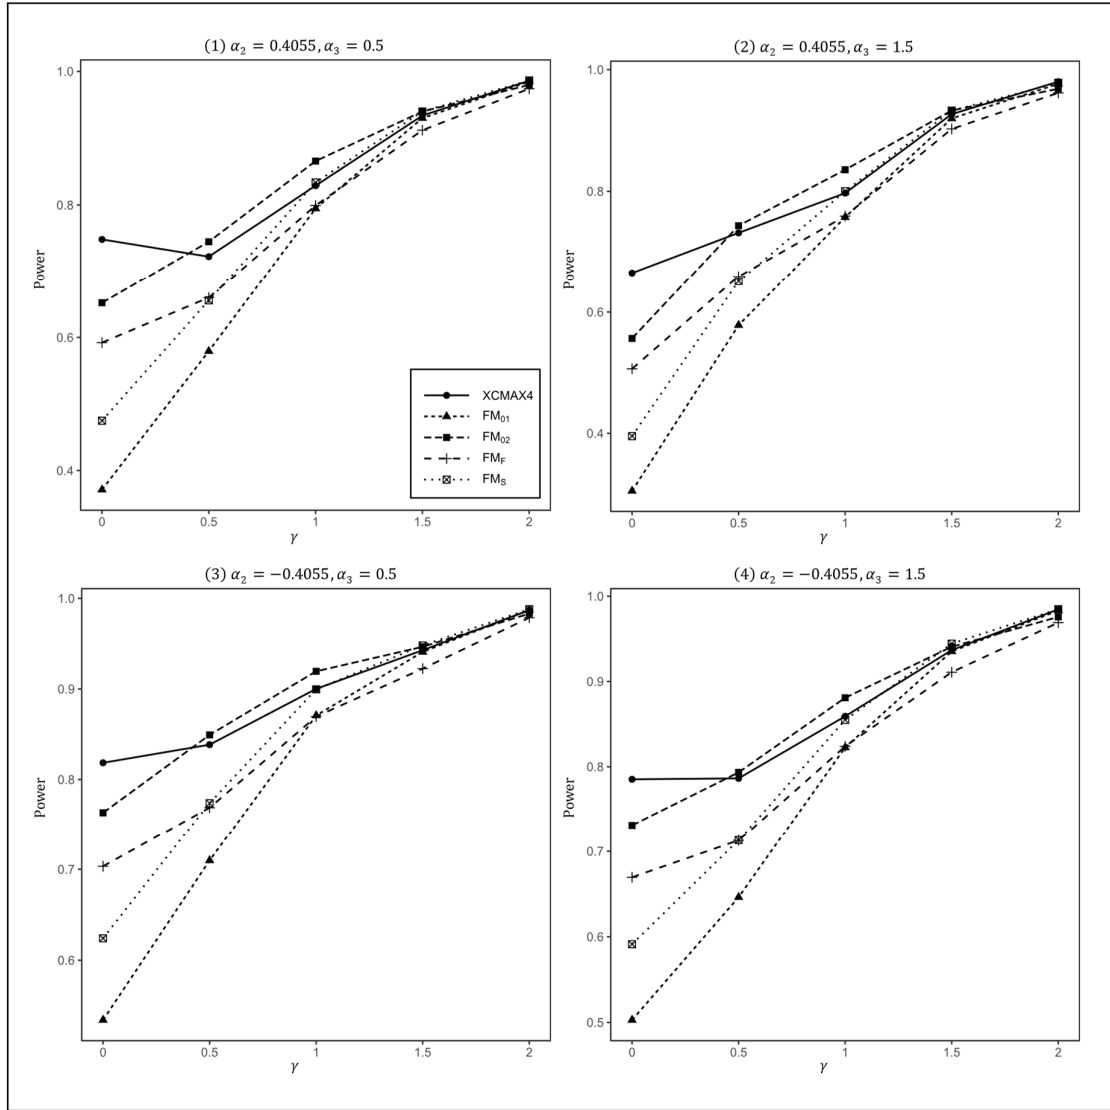

**Figure S11.** Estimated powers of XCMAX4, FM<sub>01</sub>, FM<sub>02</sub>, FM<sub>F</sub>, and FM<sub>S</sub> under various XCI models. The simulation is based on 10,000 replicates with  $\beta = 0.1858$ ,  $\alpha_1 = -5$ ,  $F = 0$ ,  $q_f = 0.2$ , and  $q_m = 0.3$ .

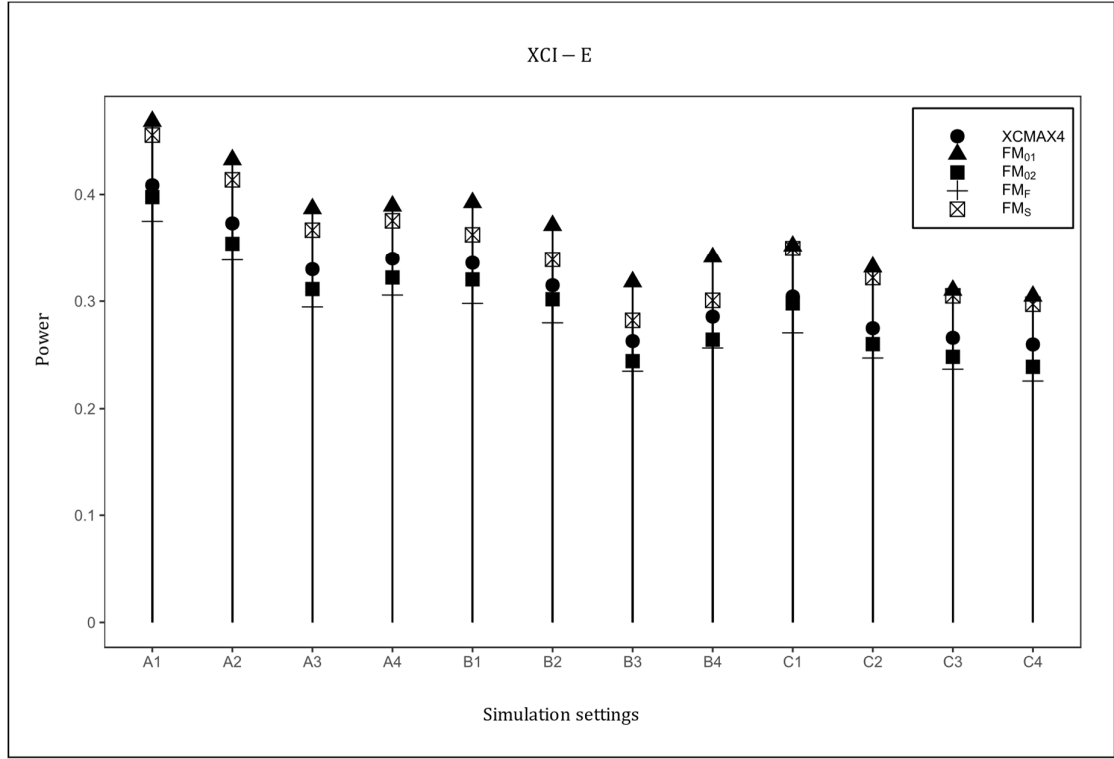

**Figure S12.** Powers of XCMAx4, FM<sub>01</sub>, FM<sub>02</sub>, FM<sub>F</sub>, and FM<sub>S</sub> under XCI-E. The simulation is based on 10,000 replicates with  $\beta = 0.1858$ ,  $\alpha_1 = -5$ , and  $F = 0$ . In the horizontal coordinates, "A", "B" and "C" represent three combinations of  $(q_f, q_m)$ : (0.3,0.3), (0.3,0.2), and (0.2,0.3), respectively, and the numbers 1-4 represent four combinations of  $(\alpha_2, \alpha_3)$ : (0.4055,0.5), (0.4055,1.5), (-0.4055,0.5), and (-0.4055,1.5), respectively.

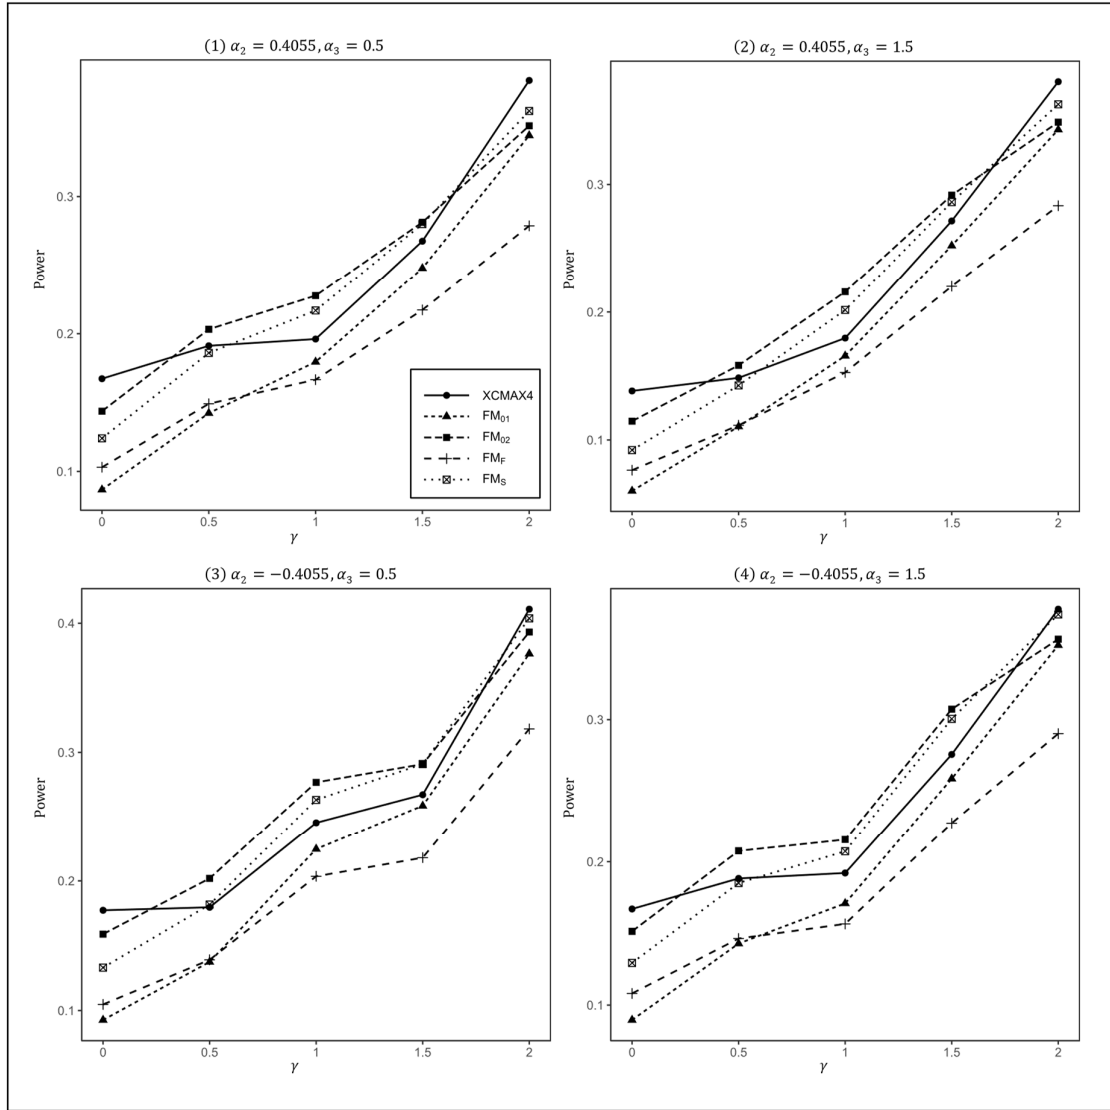

**Figure S13.** Estimated powers of XCMAX4, FM<sub>01</sub>, FM<sub>02</sub>, FM<sub>F</sub>, and FM<sub>S</sub> under various XCI models. The simulation is based on 10,000 replicates with  $\beta = 0.1116$ ,  $\alpha_1 = -5$ ,  $F = 0.05$ , and  $q_f = q_m = 0.3$ .



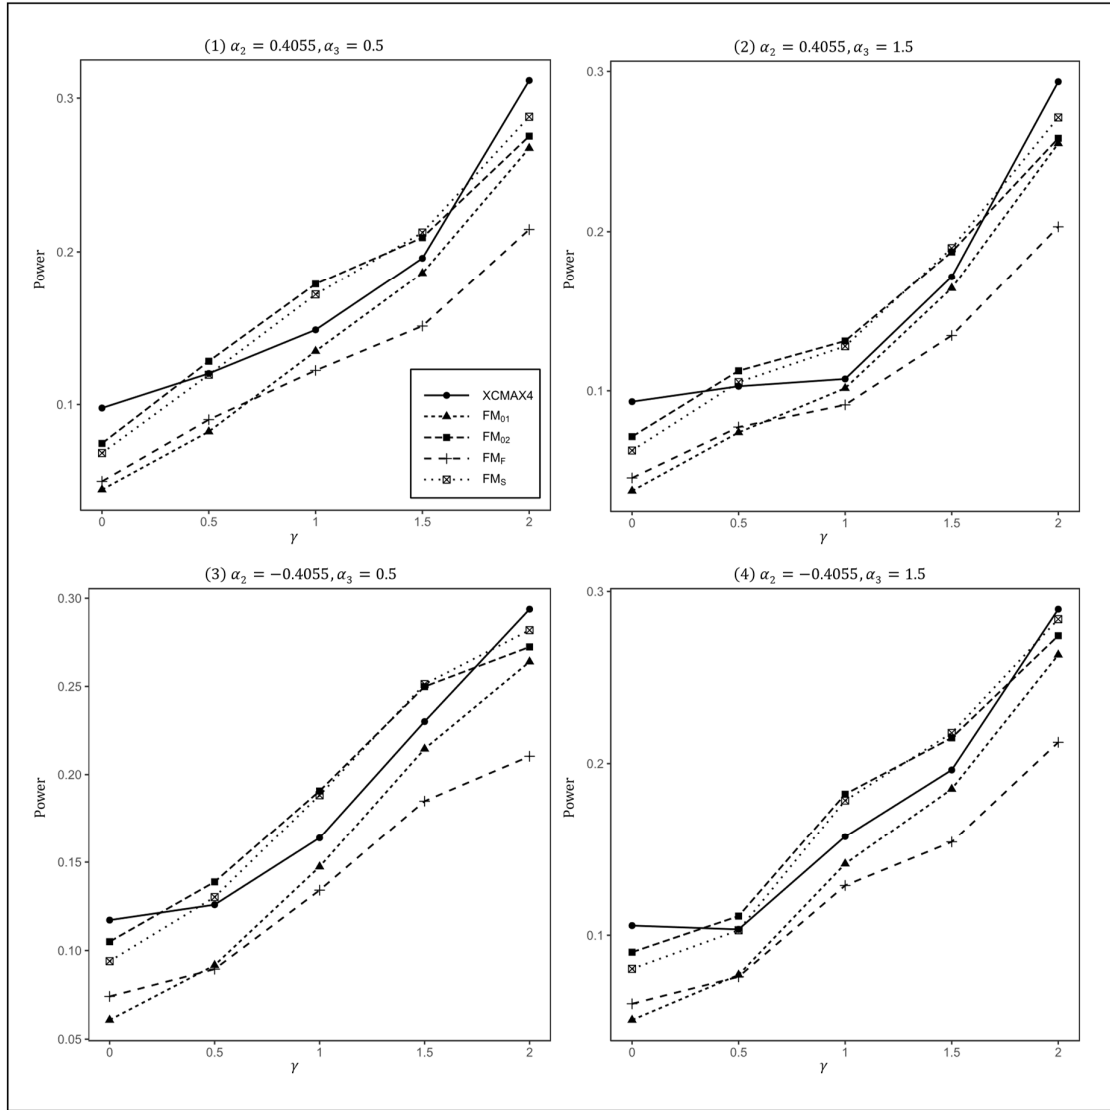

**Figure S14.** Estimated powers of XCMAX4, FM<sub>01</sub>, FM<sub>02</sub>, FM<sub>F</sub>, and FM<sub>S</sub> under various XCI models. The simulation is based on 10,000 replicates with  $\beta = 0.1116$ ,  $\alpha_1 = -5$ ,  $F = 0.05$ ,  $q_f = 0.3$ , and  $q_m = 0.2$ .

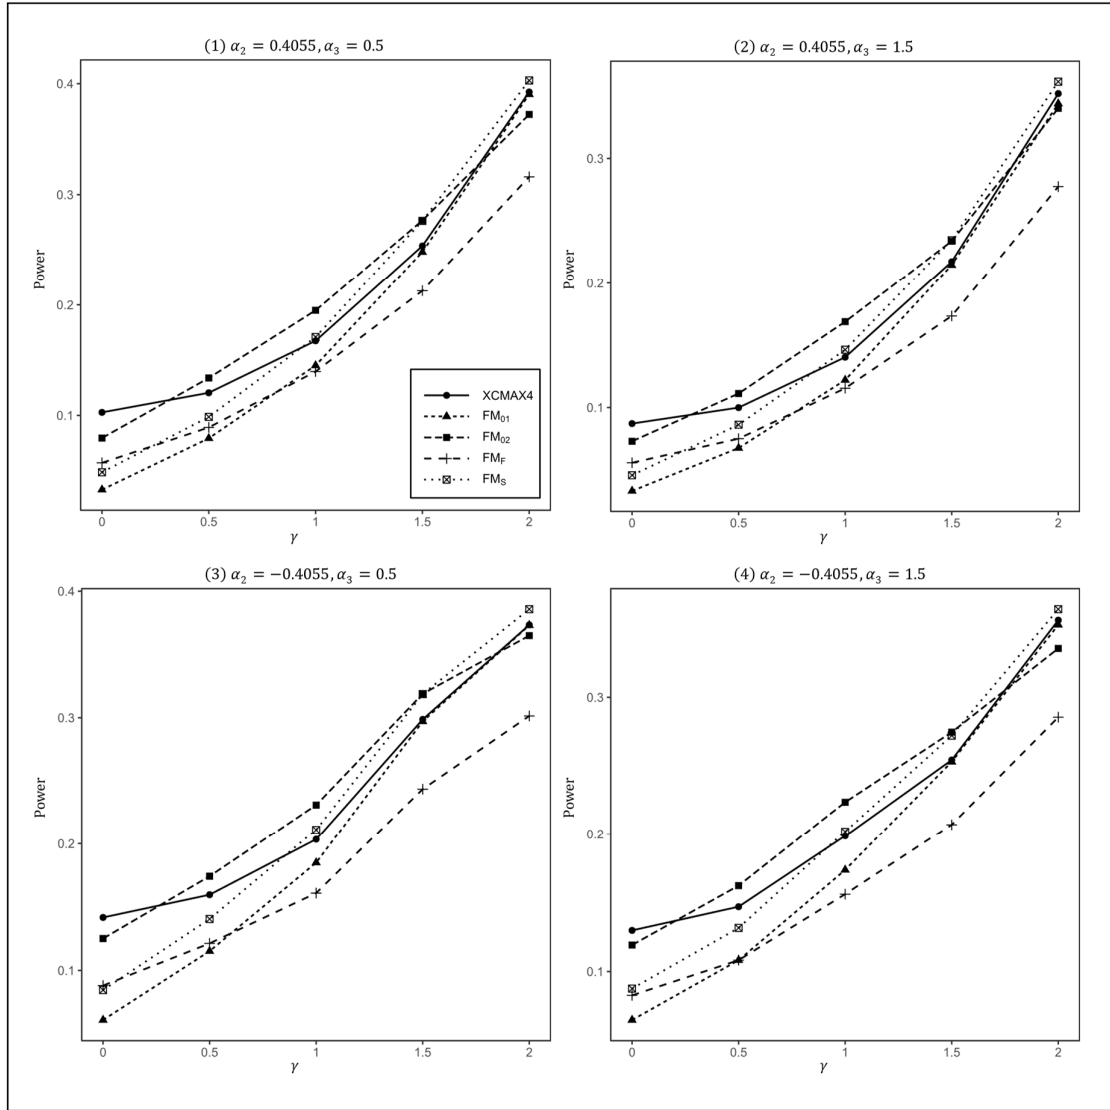

**Figure S15.** Estimated powers of XCMAX4, FM<sub>01</sub>, FM<sub>02</sub>, FM<sub>F</sub>, and FM<sub>S</sub> under various XCI models. The simulation is based on 10,000 replicates with  $\beta = 0.1116$ ,  $\alpha_1 = -5$ ,  $F = 0.05$ ,  $q_f = 0.2$ , and  $q_m = 0.3$ .

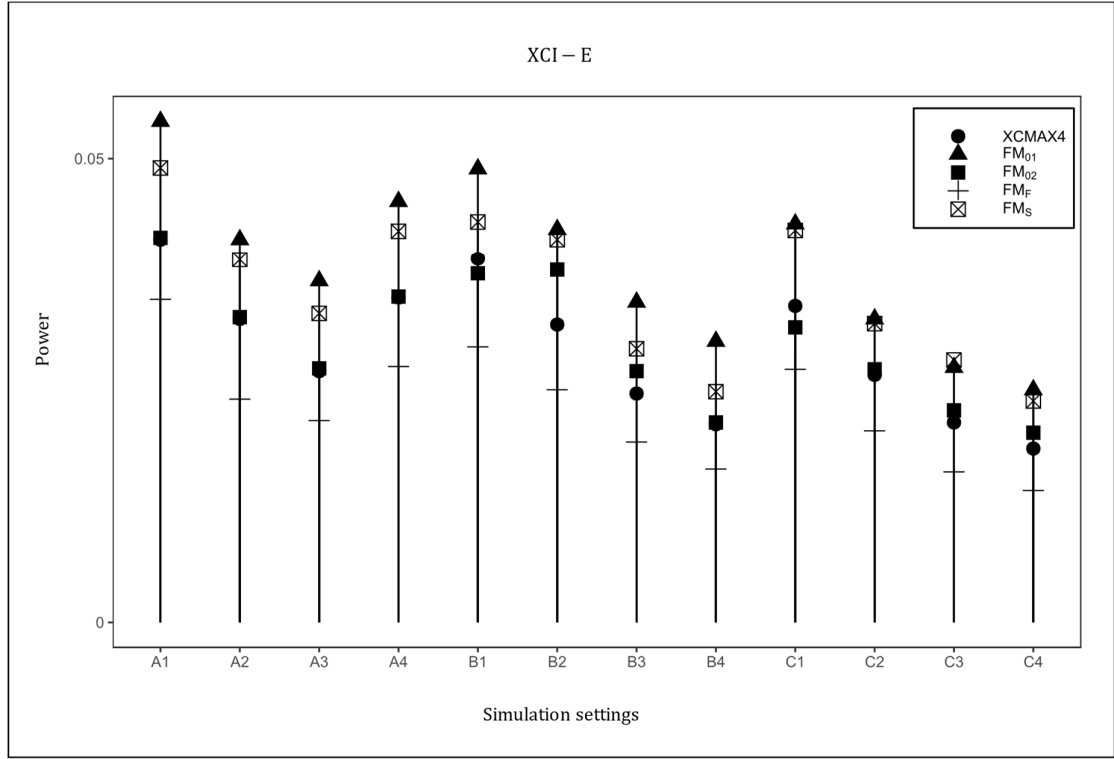

**Figure S16.** Powers of XCMA4, FM<sub>01</sub>, FM<sub>02</sub>, FM<sub>F</sub>, and FM<sub>S</sub> under XCI-E. The simulation is based on 10,000 replicates with  $\beta = 0.1116$ ,  $\alpha_1 = -5$ , and  $F = 0.05$ . In the horizontal coordinates, "A", "B" and "C" represent three combinations of  $(q_f, q_m)$ : (0.3,0.3), (0.3,0.2), and (0.2,0.3), respectively, and the numbers 1-4 represent four combinations of  $(\alpha_2, \alpha_3)$ : (0.4055,0.5), (0.4055,1.5), (-0.4055,0.5), and (-0.4055,1.5), respectively.

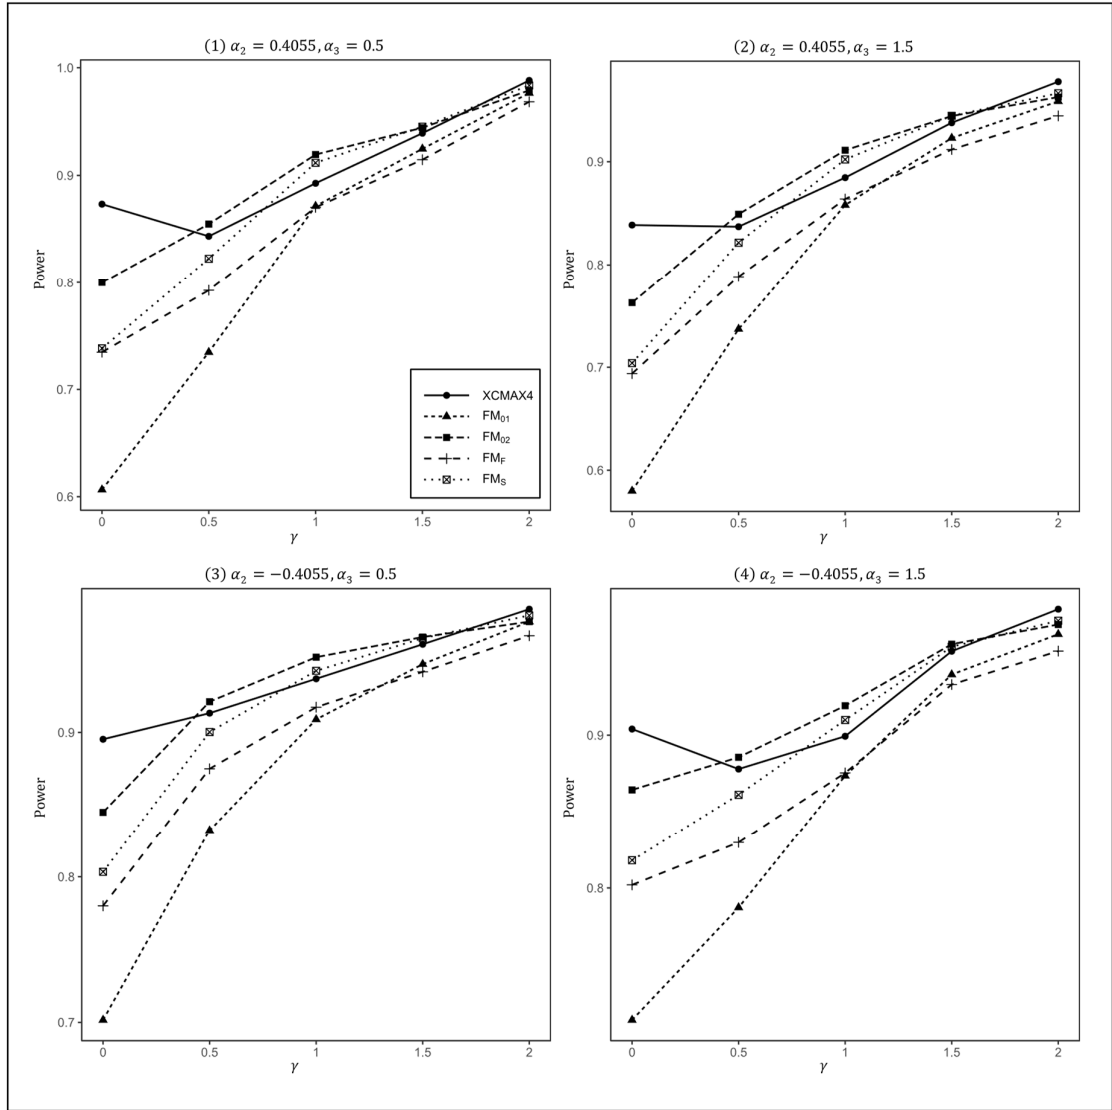

**Figure S17.** Estimated powers of XCMAX4, FM<sub>01</sub>, FM<sub>02</sub>, FM<sub>F</sub>, and FM<sub>S</sub> under various XCI models. The simulation is based on 10,000 replicates with  $\beta = 0.1858$ ,  $\alpha_1 = -5$ ,  $F = 0.05$ , and  $q_f = q_m = 0.3$ .

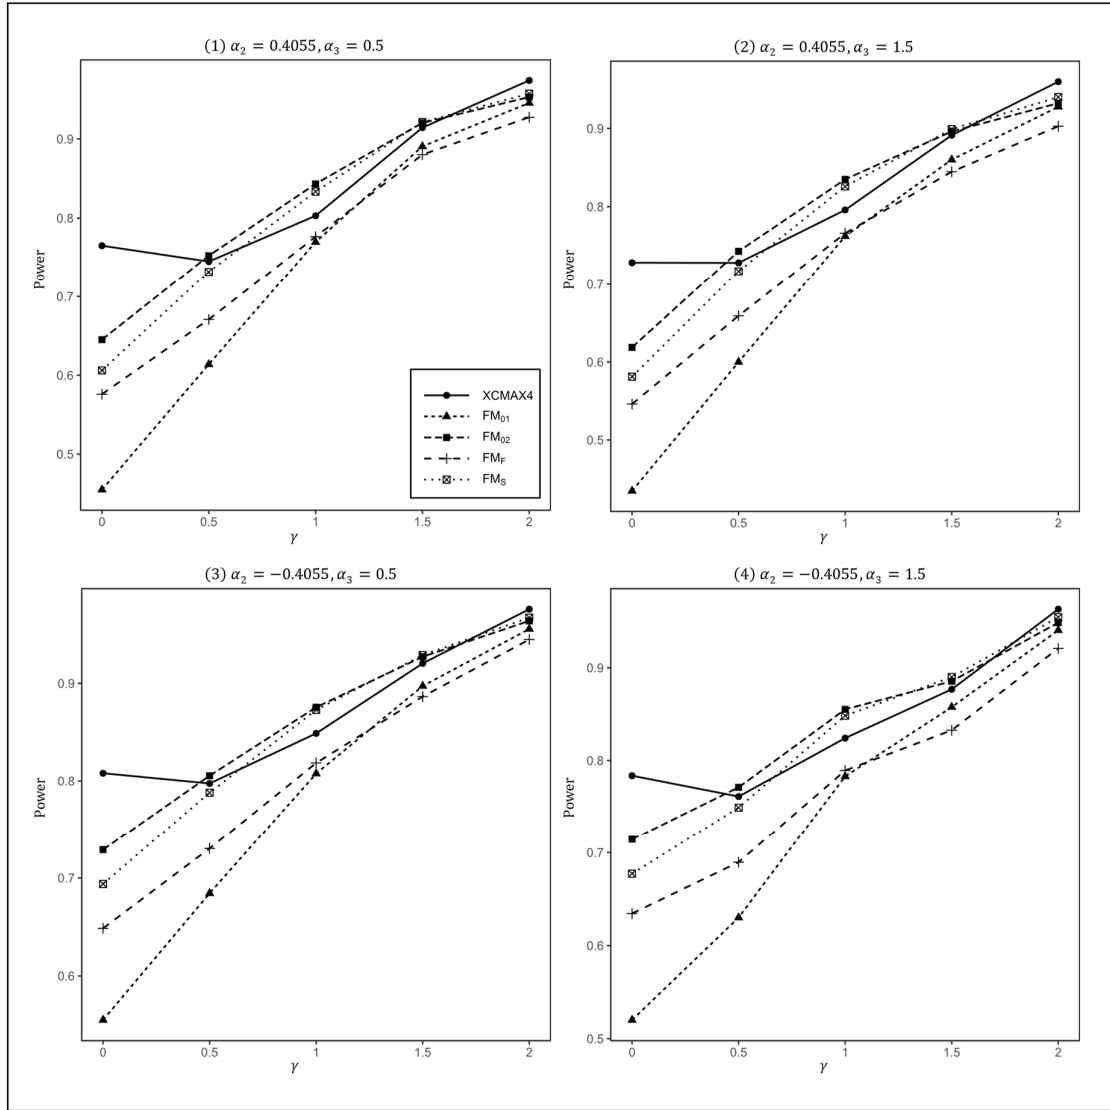

**Figure S18.** Estimated powers of XCMAX4, FM<sub>01</sub>, FM<sub>02</sub>, FM<sub>F</sub>, and FM<sub>S</sub> under various XCI models. The simulation is based on 10,000 replicates with  $\beta = 0.1858$ ,  $\alpha_1 = -5$ ,  $F = 0.05$ ,  $q_f = 0.3$ , and  $q_m = 0.2$ .

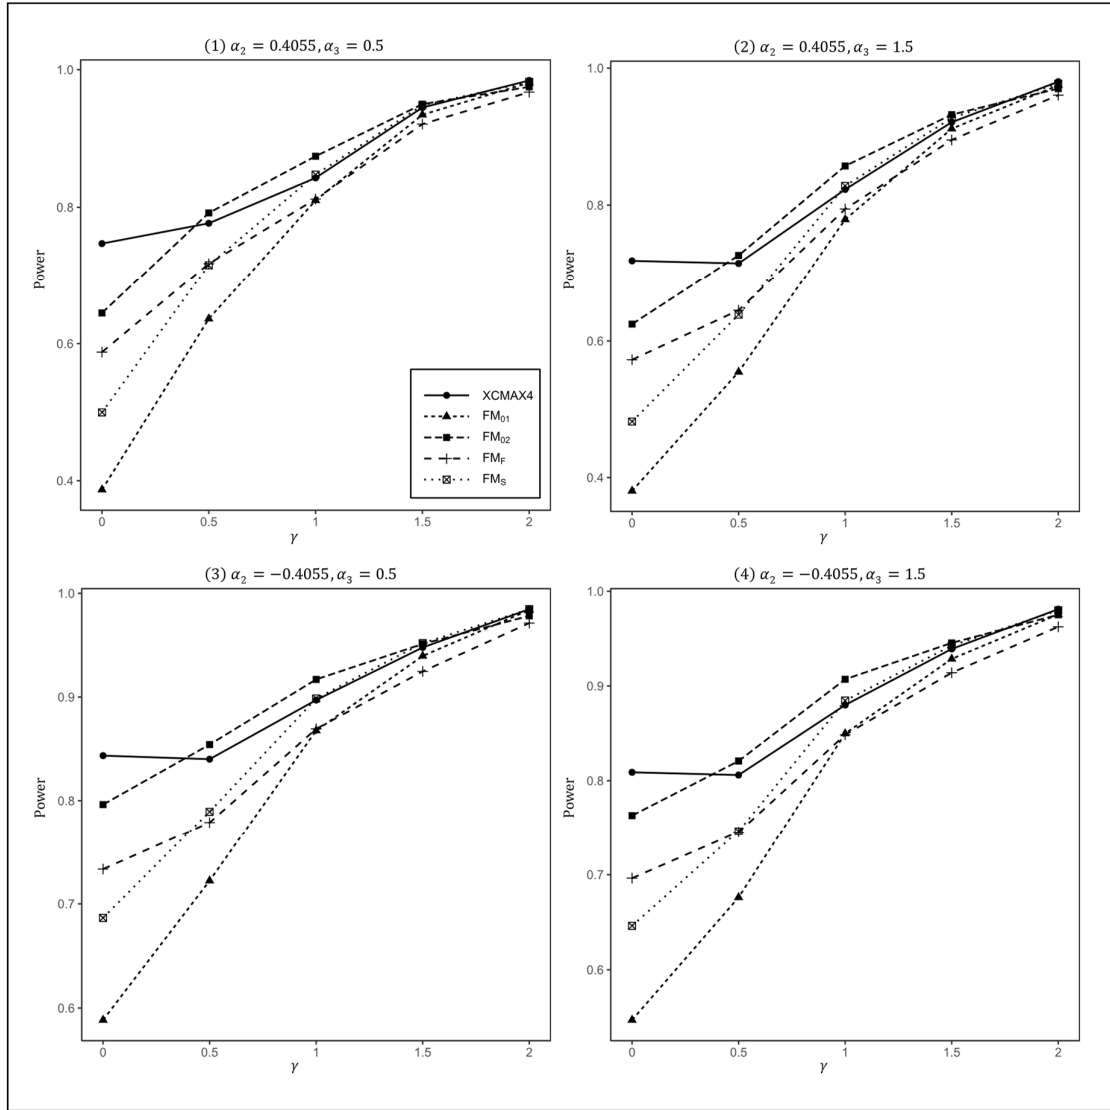

**Figure S19.** Estimated powers of XCMAX4, FM<sub>01</sub>, FM<sub>02</sub>, FM<sub>F</sub>, and FM<sub>S</sub> under various XCI models. The simulation is based on 10,000 replicates with  $\beta = 0.1858$ ,  $\alpha_1 = -5$ ,  $F = 0.05$ ,  $q_f = 0.2$ , and  $q_m = 0.3$ .

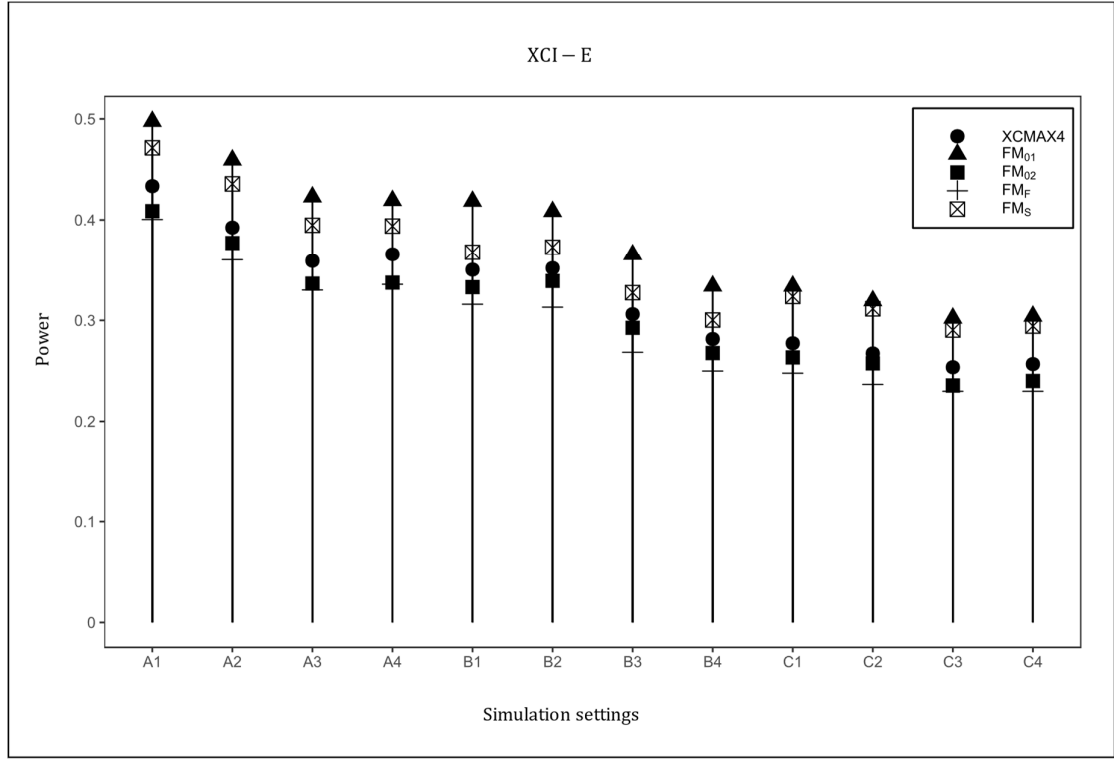

**Figure S20.** Powers of XCMA4, FM<sub>01</sub>, FM<sub>02</sub>, FM<sub>F</sub>, and FM<sub>S</sub> under XCI-E. The simulation is based on 10,000 replicates with  $\beta = 0.1858$ ,  $\alpha_1 = -5$ , and  $F = 0.05$ . In the horizontal coordinates, "A", "B" and "C" represent three combinations of  $(q_f, q_m)$ : (0.3,0.3), (0.3,0.2), and (0.2,0.3), respectively, and the numbers 1-4 represent four combinations of  $(\alpha_2, \alpha_3)$ : (0.4055,0.5), (0.4055,1.5), (-0.4055,0.5), and (-0.4055,1.5), respectively.
